# Supplementary figures and images for: Synergistic Effects of the Jackfruit Seed Sourced Resistant Starch and Bifidobacterium pseudolongum subsp. globosum on Suppression of Hyperlipidemia in Mice
Source: MDPI journal article supplement (doi:10.3390/foods10061431), 2021-06-21

**A**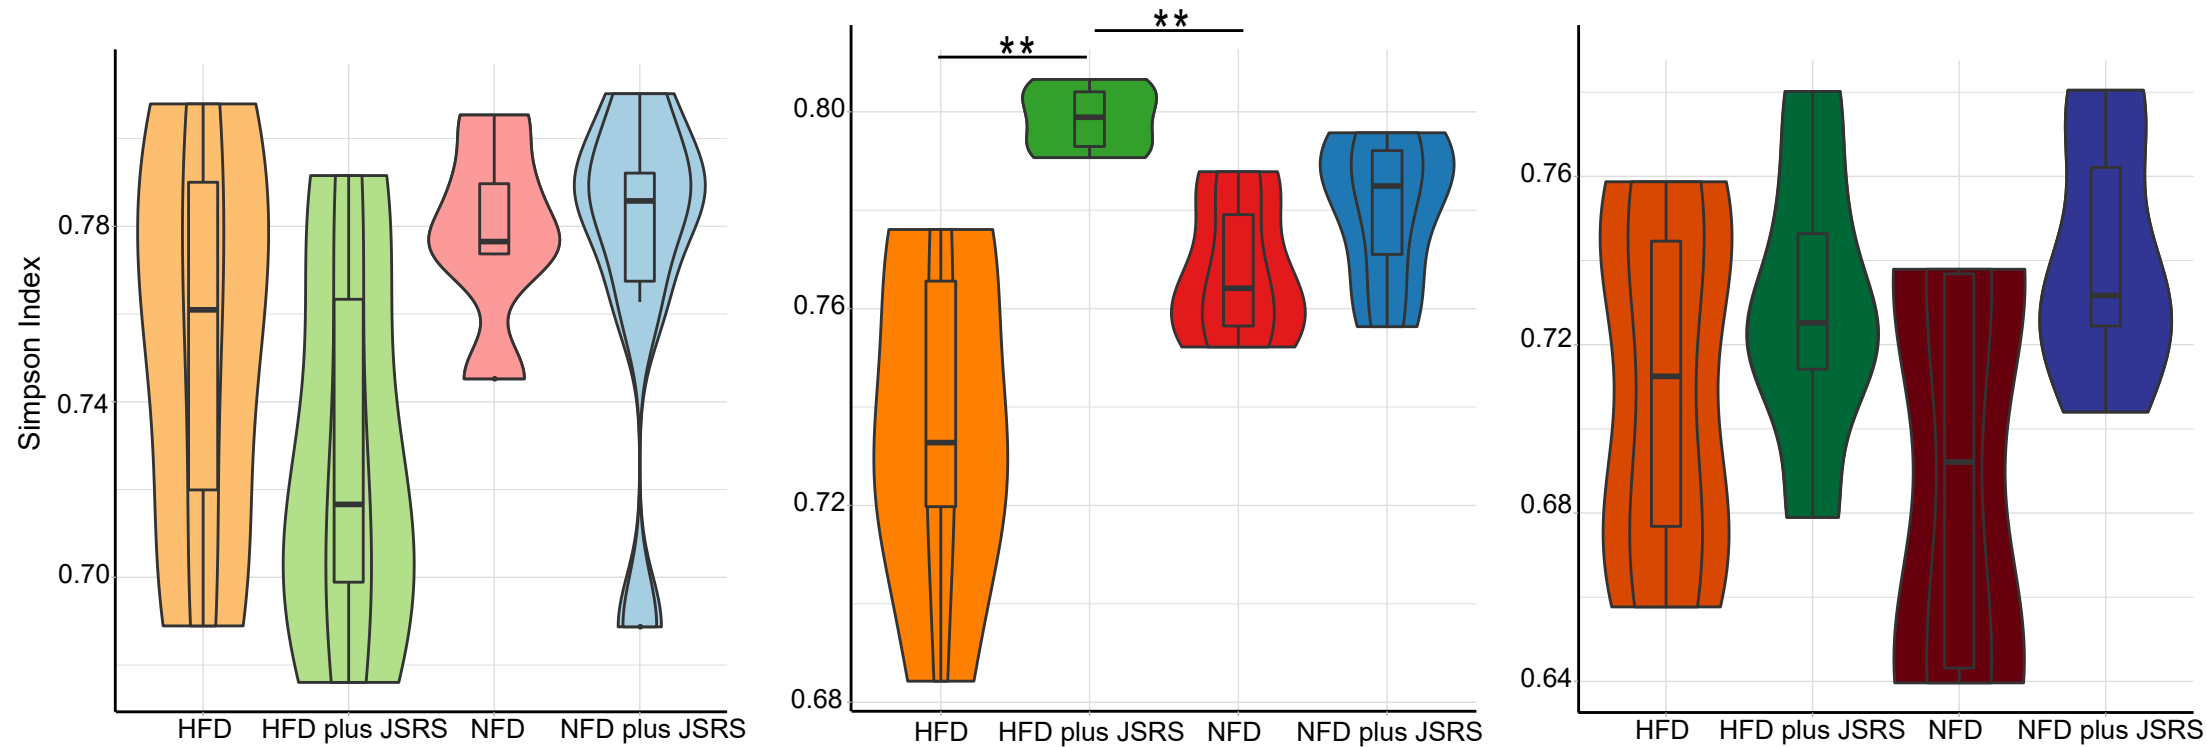**B****Week 2****Week 4****Week 8**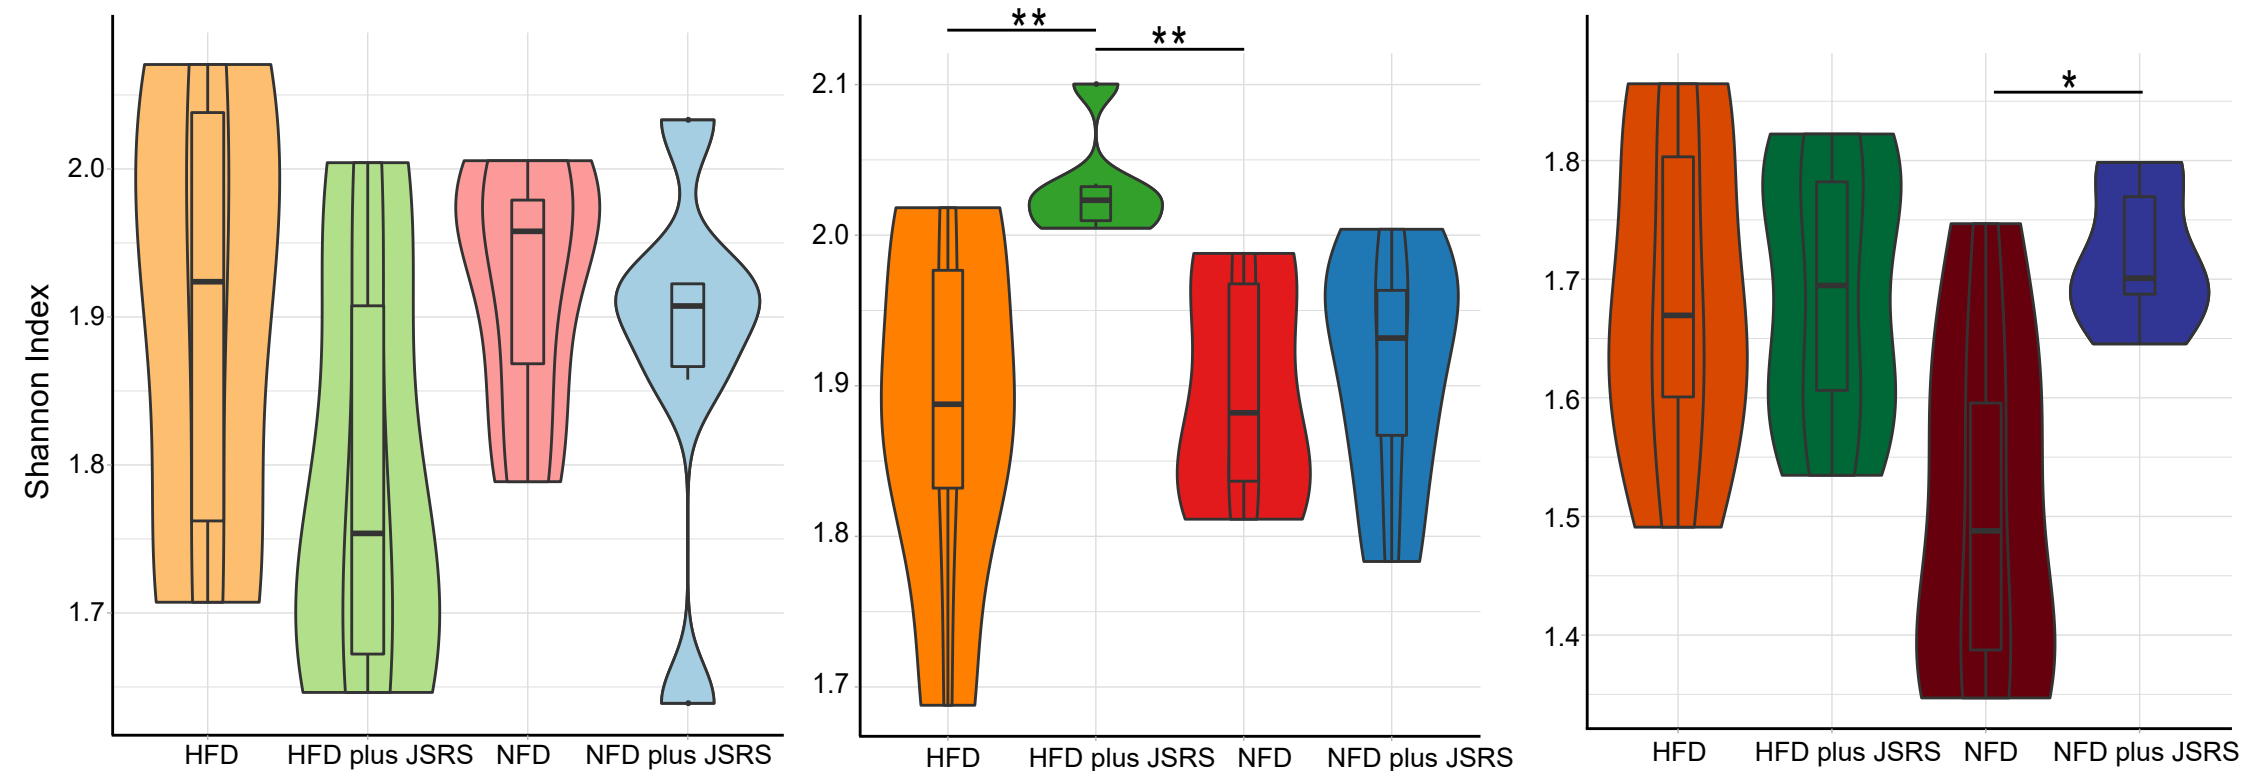

Supplement: s1 [file s1]

A

JSRS medium (After the iodine solution added)

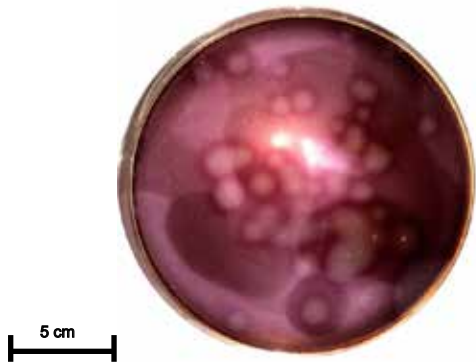

B

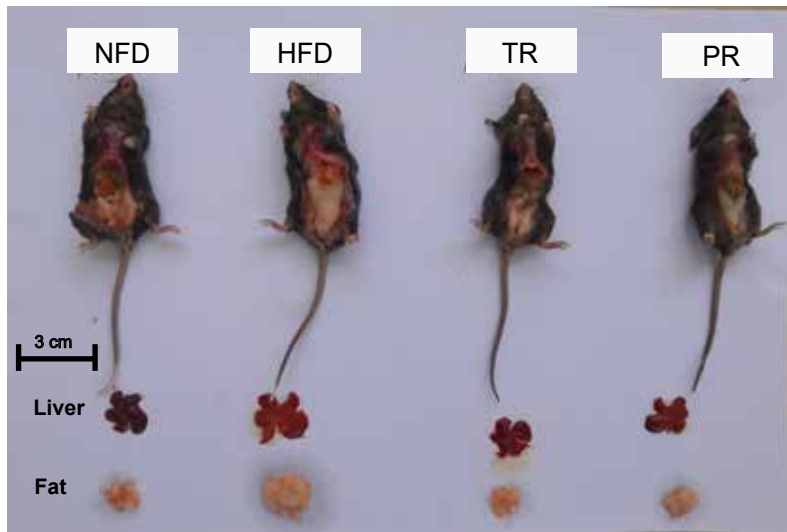

Supplement: s1 [file s1]

A

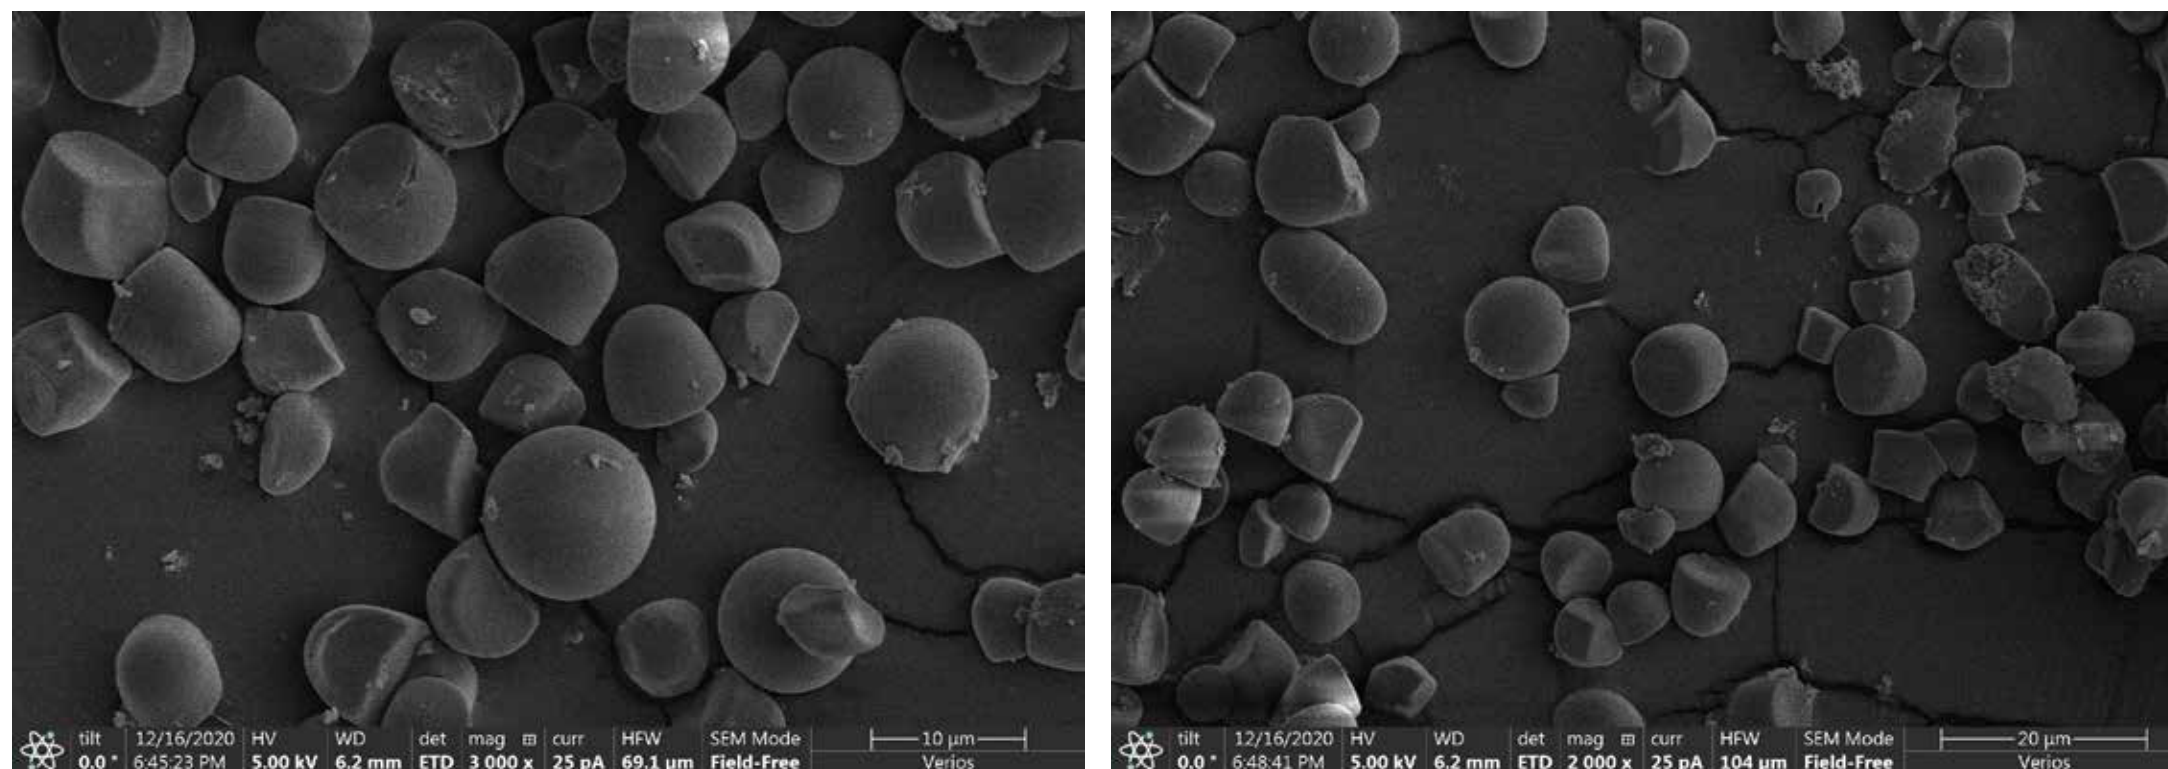

B

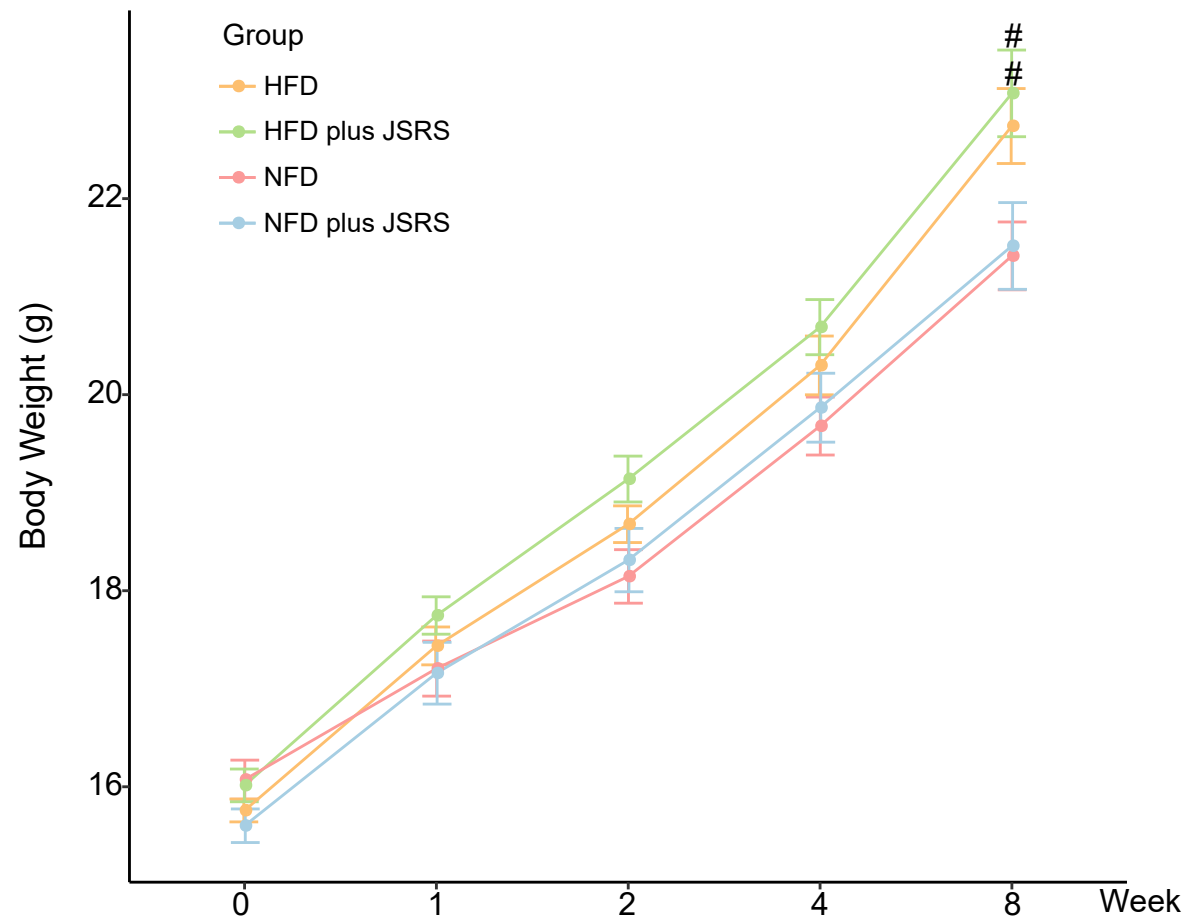

C

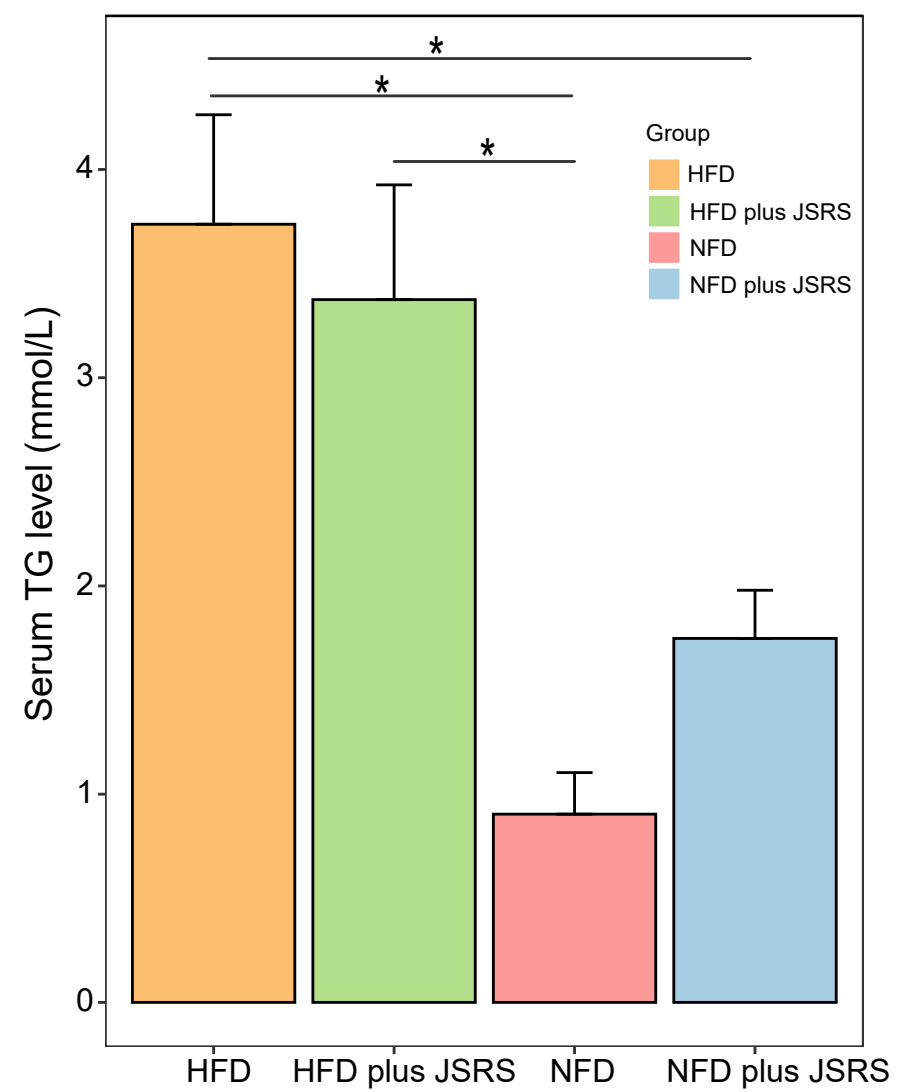

Supplement: s1 [file s1]
